# Supplementary material
Source: publisher figshare collection journal article supplement (https://frontiersin.figshare.com/ndownloader/files/28186638)
Supplement: Supplementary file [file 28186638]

## Supplemental files – Photos

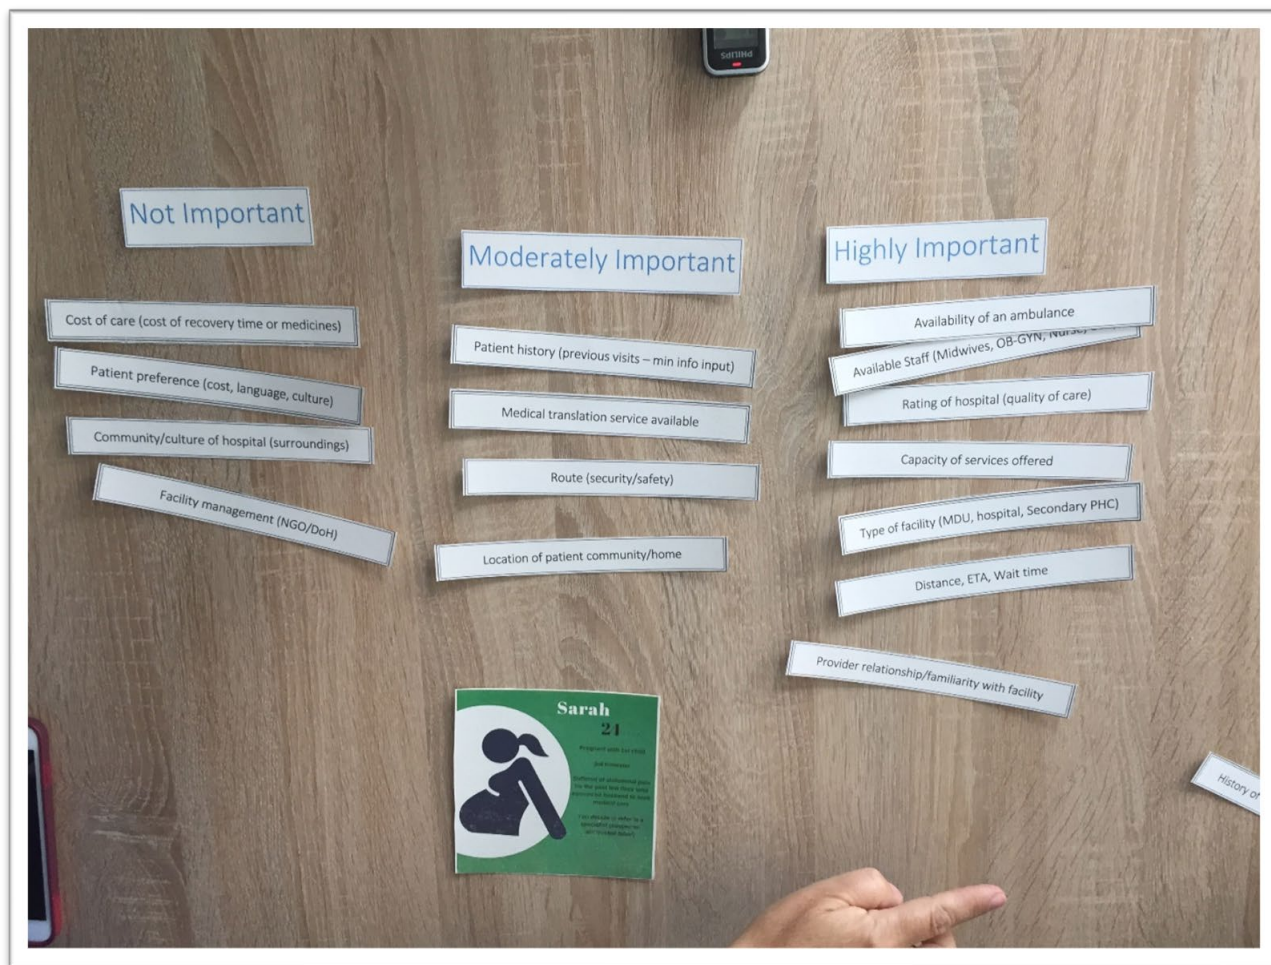

Figure 1: Referral Decision Making - Focus Group Discussion, Hospital Healthcare Personnel
